# Supplementary material
Source: publisher figshare collection journal article supplement (https://acs.figshare.com/ndownloader/files/4576684)
Supplement: Supplementary file 1 [file 4576684]

# Heterogeneous and Photochemical Reactions of Solid Benzophenone–Catechol Films with NO<sub>2</sub>.

Brian R. Nichols, Christopher Rapa, Vincent Costa, Ryan Z. Hinrichs<sup>\*</sup>

Department of Chemistry, Drew University, Madison, NJ 07940

## Supplemental Information.

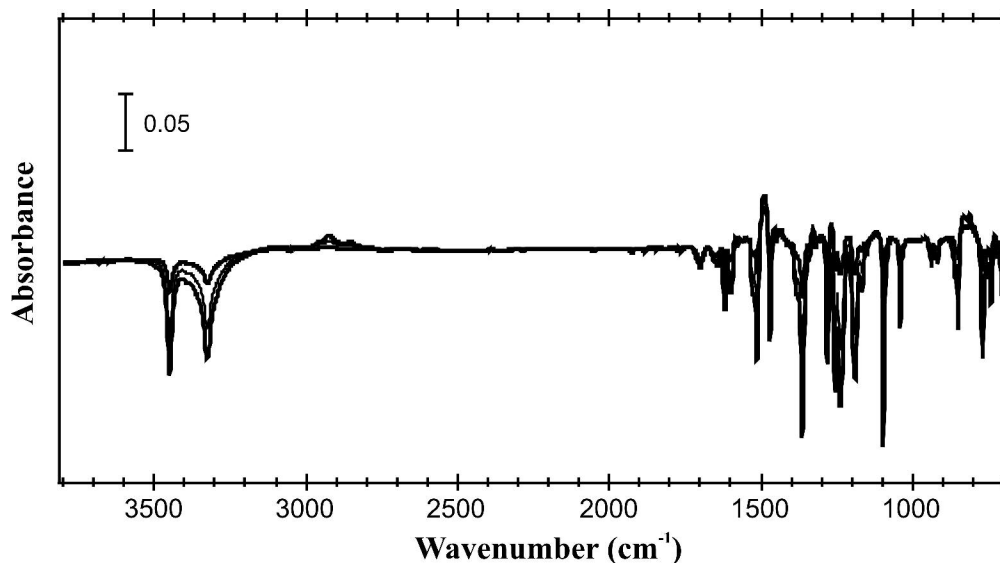

**Figure S1.** Reaction spectra for pure catechol films exposed to NO<sub>2</sub> concentrations up to  $2.23 \times 10^{13}$  molecules cm<sup>-3</sup> (equivalent to 907 ppb) at 300 K and 20% RH. Final spectrum recorded at 90 minutes. Negative peaks, including O-H stretching vibrations, correspond to sublimation of catechol. No absorbance peaks associated condensed-phase reaction products were detected. Similar results were obtained for both dark and light conditions.

<sup>\*</sup> rhinrich@drew.edu, phone: 973.408.3853, fax: 973.408.3572

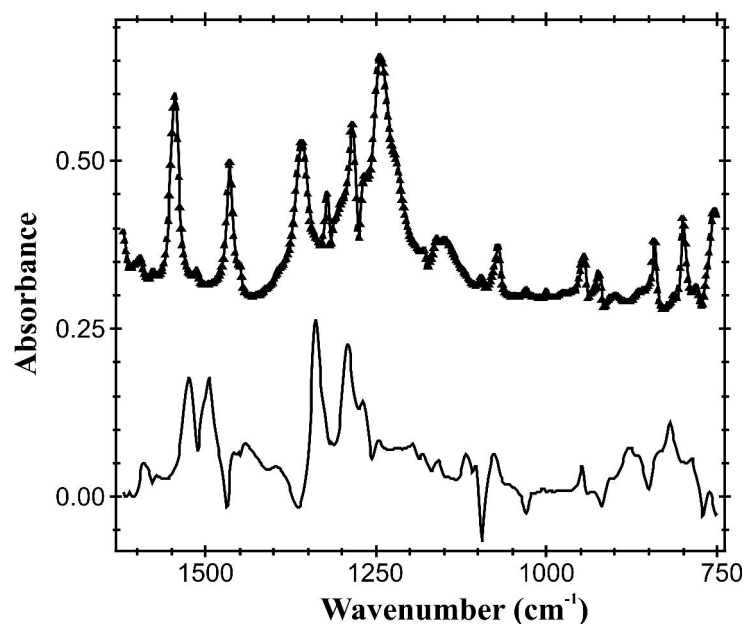

**Figure S2.** Comparison of typical dark reaction spectrum (bottom) with spectrum of 3-nitro catechol in a benzophenone mixture (with benzophenone peaks subtracted out). The maximum allowable contribution of 3-nitro catechol in the reaction spectrum is < 13% by mass compared to 4-nitro catechol spectrum.

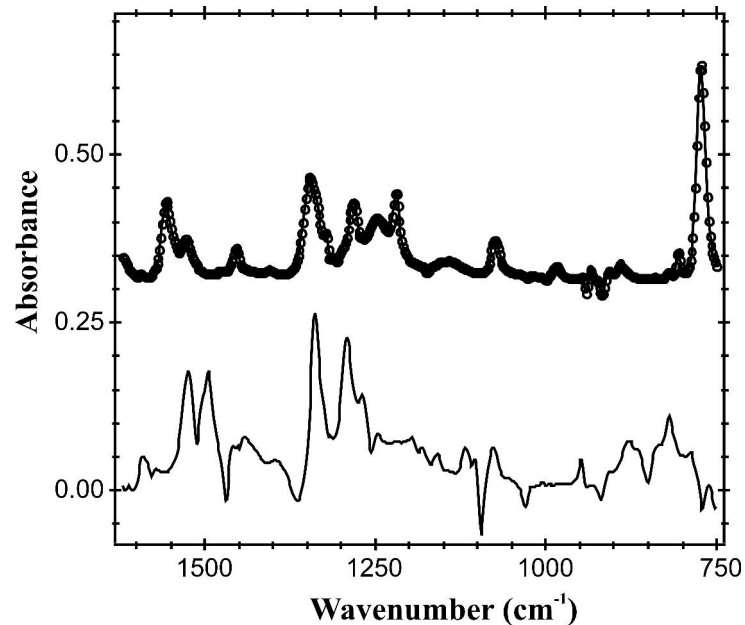

**Figure S3.** Comparison of typical dark reaction spectrum (bottom) with spectrum of 3,5-dinitro catechol in a benzophenone mixture (with benzophenone peaks subtracted out). The maximum allowable contribution of 3-nitro catechol in the reaction spectrum is < 9% by mass.
